# Supplementary material
Source: PubMed Central journal article supplement (PMC5557038)
Supplement: NIHMS880403-supplement-1.pdf [file NIHMS880403-supplement-1.pdf]

## Inventory of Supplemental Information

-Figures S1-6 with legends (pages 1-7)

-Tables S1 and S2 (page 8)

-Supplemental Experimental Procedures (pages 9-13)
